# Supplementary material for: The Prevalence of Reproductive Tract Infections in a Chinese Internal Migrant Population, and Its Correlation with Knowledge, Attitude, and Practices: A Cross-Sectional Study
Source: MDPI journal article supplement (doi:10.3390/ijerph16040655), 2019-02-22
Supplement: s1 [file s1]

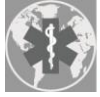

*Supplementary appendix*

# **The Prevalence of Reproductive Tract Infections in a Chinese Internal Migrant Population, and Its Correlation with Knowledge, Attitude, and Practices: A Cross-Sectional Study**

Shuangfei Xu <sup>1,2,3</sup>, Chuanning Yu <sup>4</sup>, Ying Zhou <sup>1,2</sup>, Junqing Wu <sup>1,2</sup>, Tieling Bai <sup>5</sup>, Junxian Zhang <sup>6</sup>, Yuyan Li <sup>1,2,\*</sup>

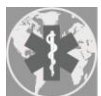

**Table S1.** Socio-Demographics Characteristics variables.

| Variable                                           | Category                            | Code | Scale       |
|----------------------------------------------------|-------------------------------------|------|-------------|
| Area                                               | Yinchuan                            | 1    | Nominal     |
|                                                    | Urumchi                             | 2    |             |
|                                                    | Shanghai                            | 3    |             |
| Age                                                | 15-24                               | 1    | Ordinal     |
|                                                    | 25-34                               | 2    |             |
|                                                    | 35-44                               | 3    |             |
|                                                    | 45-49                               | 4    |             |
| Sex                                                | Male                                | 1    | Dichotomous |
|                                                    | Female                              | 2    |             |
| Educational level                                  | Elementary school or lower          | 1    | Ordinal     |
|                                                    | Junior high school                  | 2    |             |
|                                                    | High school                         | 3    |             |
|                                                    | College or higher                   | 4    |             |
| Occupation                                         | Laborer                             | 1    | Nominal     |
|                                                    | Service worker                      | 2    |             |
|                                                    | White-collar worker                 | 3    |             |
|                                                    | Other (unemployed or self-employed) | 4    |             |
| Marital status                                     | Married                             | 1    | Dichotomous |
|                                                    | Unmarried                           | 2    |             |
| Family per capita monthly income (CNY)             | <1000                               | 1    | Ordinal     |
|                                                    | 1000-2999                           | 2    |             |
|                                                    | 3000-4999                           | 3    |             |
|                                                    | 5000-6999                           | 4    |             |
|                                                    | >7000                               | 5    |             |
| Type of household registration (hukou)             | Rural                               | 1    | Dichotomous |
|                                                    | Urban                               | 2    |             |
| Duration of staying in residence per` year (month) | <6                                  | 1    | Ordinal     |
|                                                    | 6-                                  | 2    |             |
|                                                    | 12                                  | 3    |             |

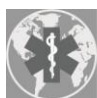

**Table S2.** RTIs-Related Knowledge, Attitude and Practice variables.

| Variable                                                           | Category              | Code | Scale       |
|--------------------------------------------------------------------|-----------------------|------|-------------|
| <b>Knowledge</b>                                                   |                       |      |             |
| RTIs identification knowledge                                      |                       |      | Continuous  |
| RTIs prevention knowledge                                          |                       |      | Continuous  |
| <b>Attitude</b>                                                    |                       |      |             |
| Whether or not essential to develop RTIs census                    | Yes                   | 1    | Nominal     |
|                                                                    | No                    | 2    |             |
|                                                                    | Uncertain             | 3    |             |
| Whether or not willing to take RTIs related education courses      | Yes                   | 1    | Dichotomous |
|                                                                    | No                    | 2    |             |
| Preferred education methods a explanation/counselling from doctors | Yes                   | 1    | Dichotomous |
|                                                                    | No                    | 2    |             |
| Brochures                                                          | Yes                   | 1    | Dichotomous |
|                                                                    | No                    | 2    |             |
| Lectures                                                           | Yes                   | 1    | Dichotomous |
|                                                                    | No                    | 2    |             |
| Books                                                              | Yes                   | 1    | Dichotomous |
|                                                                    | No                    | 2    |             |
| Newspapers                                                         | Yes                   | 1    | Dichotomous |
|                                                                    | No                    | 2    |             |
| Broadcast / Television                                             | Yes                   | 1    | Dichotomous |
|                                                                    | No                    | 2    |             |
| Telephone Hotline                                                  | Yes                   | 1    | Dichotomous |
|                                                                    | No                    | 2    |             |
| Posters                                                            | Yes                   | 1    | Dichotomous |
|                                                                    | No                    | 2    |             |
| Others                                                             | Yes                   | 1    | Dichotomous |
|                                                                    | No                    | 2    |             |
| <b>Practice</b>                                                    |                       |      |             |
| Personal hygiene                                                   |                       |      |             |
| Frequency of changing underwear                                    | Everyday              | 1    | Ordinal     |
|                                                                    | Once in 2-3 days      | 2    |             |
|                                                                    | Once in $\geq 4$ days | 3    |             |
| Frequency of cleaning genitals                                     | Everyday              | 1    | Ordinal     |
|                                                                    | Once in 2-3 days      | 2    |             |
|                                                                    | Once in $\geq 4$ days | 3    |             |
| Frequency of taking bath                                           | Everyday              | 1    | Ordinal     |
|                                                                    | Once in 2-3 days      | 2    |             |
|                                                                    | Once in $\geq 4$ days | 3    |             |
| Bath methods                                                       | Shower                | 1    | Nominal     |
|                                                                    | Tub bath              | 2    |             |
|                                                                    | Other                 | 3    |             |
| Whether or not having sexual behavior during menstruation          | Yes                   | 1    | Dichotomous |
|                                                                    | No                    | 2    |             |
| Whether or not having RTI symptoms in last month                   | Yes                   | 1    | Dichotomous |
|                                                                    | No                    | 2    |             |
| RTI symptoms                                                       |                       |      |             |

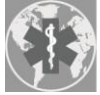

---

|                                       |               |   |             |
|---------------------------------------|---------------|---|-------------|
| excessive or smelly genital secretion | Yes           | 1 | Dichotomous |
|                                       | No            | 2 |             |
| genital itching                       | Yes           | 1 | Dichotomous |
|                                       | No            | 2 |             |
| genital vesicle                       | Yes           | 1 | Dichotomous |
|                                       | No            | 2 |             |
| genital excrescence                   | Yes           | 1 | Dichotomous |
|                                       | No            | 2 |             |
| pain on urination                     | Yes           | 1 | Dichotomous |
|                                       | No            | 2 |             |
| Contraceptive methods in use          | No            | 1 | Nominal     |
|                                       | IUD           | 2 |             |
|                                       | Condom        | 3 |             |
|                                       | Pill          | 4 |             |
|                                       | Sterilization | 5 |             |
|                                       | Others        | 6 |             |
| Number of sexual partners             | Refusal       | 1 |             |
|                                       | 1             | 2 |             |
|                                       | 2             | 3 |             |
|                                       | ≥3            | 4 |             |
| Number of children                    | 0             | 1 | Ordinal     |
|                                       | 1             | 2 |             |
|                                       | 2             | 3 |             |
|                                       | ≥3            | 4 |             |

---



**Table S3.** Laboratory- confirmed RTIs species.

| Variable                               | Category | Code | Scale       |
|----------------------------------------|----------|------|-------------|
| Sexually transmitted infections (STIs) |          |      |             |
| Trichomonal vaginitis (TV)             | Yes      | 1    | Dichotomous |
|                                        | No       | 2    |             |
| Chlamydia trachomatis (CT)             | Yes      | 1    | Dichotomous |
|                                        | No       | 2    |             |
| Neisseria gonorrhoeae (NGH)            | Yes      | 1    | Dichotomous |
|                                        | No       | 2    |             |
| Ureaplasma urealyticum (UU)            | Yes      | 1    | Dichotomous |
|                                        | No       | 2    |             |
| Syphilis                               | Yes      | 1    | Dichotomous |
|                                        | No       | 2    |             |
| Human immunodeficiency virus (HIV)     | Yes      | 1    | Dichotomous |
|                                        | No       | 2    |             |
| Endogenous Infections                  |          |      |             |
| Bacterial vaginosis (BV)               | Yes      | 1    | Dichotomous |
|                                        | No       | 2    |             |
| vulvovaginal candidiasis (VVC)         | Yes      | 1    | Dichotomous |
|                                        | No       | 2    |             |



**Table S4.** Internal migrant population of reproductive age from the Sixth Nationwide Population Census.

|       | <b>Male</b> |          | <b>Female</b> |          | <b>Total</b> |
|-------|-------------|----------|---------------|----------|--------------|
|       | <b>n</b>    | <b>%</b> | <b>n</b>      | <b>%</b> |              |
| Age   |             |          |               |          |              |
| 15-24 | 12393873    | 53.30    | 10857514      | 46.70    | 23251387     |
| 25-34 | 13312862    | 56.16    | 10392491      | 43.84    | 23705353     |
| 35-44 | 11741181    | 58.12    | 8461880       | 41.88    | 20203061     |
| 45-49 | 3557300     | 60.41    | 2330888       | 39.59    | 5888188      |



## QUESTIONNAIRE

### Socio-demographic information

A1 Birthday \_\_\_\_\_ (yyyymmdd)

A2 Gender

① Male            ② Female

A3 Educational level

① Elementary school or lower            ② Junior high school

③ High school            ④ College or higher

A4 Occupation

① Laborer            ② Service worker

③ White-collar worker            ④ Other (unemployed or self-employed)

A5 Marital status

① Married            ② Unmarried

A6 Family per capita monthly income (CNY)

① <1000            ② 1000-2999            ③ 3000-4999

④ 5000-6999            ⑤ >7000

A7 Type of household registration (hukou)

① Rural            ② Urban

A8 Duration of staying in residence per year (month)

① <6            ② 6-            ③ 12

### Knowledge

A9 The score of RTIs identification knowledge

A10 The score of RTIs prevention knowledge

### Attitud

A11 Whether or not essential to develop RTIs census

① Yes            ② No            ③ Uncertain

A12 Whether or not willing to take RTIs related education courses

① Yes            ② No (**JUMP TO A13**)

Preferren on education methods (multiple choice questions):

A12A ① explanation/counselling from doctors            A12B ② Brochures

A12C ③ Lectures            A12D ④ Books            A12E ⑤ Newspapers

A12F ⑥ Broadcast / Television            A12G ⑦ Telephone Hotline

A12H ⑧ Posters            A12I ⑨ Others \_\_\_\_\_

### Practice

Personal hygiene

A13 Frequency of changing underwear

① Everyday            ② Once in 2-3 days            ③ Once in            ④  $\geq 4$  days

A14 Frequency of cleaning genitals

① Everyday            ② Once in 2-3 days            ③ Once in            ④  $\geq 4$  days

A15 Frequency of taking bath

① Everyday            ② Once in 2-3 days            ③ Once in            ④  $\geq 4$  days



A16 Bath methods

- ① Shower    ② Tub bath    ③ Other

A17 Whether or not having sexual behavior during menstruation

- ① Yes    ② No

A18 Number of children

- ① 0    ② 1    ③ 2    ④  $\geq 3$

A19 Whether or not having RTI symptoms in last month

- ① Yes    ② No (**JUMP TO A20**)

RTI symptoms in last month (multiple choice questions):

A19A ① excessive or smelly genital secretion    A19B ② genital itching

A19C ③ genital vesicle    A19D ④ genital excrescence    A19E ⑤ pain on urination

A20 Contraceptive methods in use

- ① No    ② IUD    ③ Condom    ④ Pill    ⑤ Sterilization    ⑥ Others

A21 Number of sexual partners

- ① 0    ② 1    ③ 2    ④  $\geq 3$

INVESTIGATOR\_\_\_\_\_

DATA\_\_\_\_\_ (YYYYMMDD)
